# Supplementary material
Source: publisher figshare collection journal article supplement (https://acs.figshare.com/ndownloader/files/3828793)
Supplement: Supplementary file 1 [file 3828793]

## SUPPORTING INFORMATION

### Insights into the Origin of the Separation Selectivity with Silica Hydride Adsorbents

[Chadin Kulsing<sup>a</sup>, Yada Nolvachai<sup>a,b</sup>, Philip J. Marriott<sup>a,b</sup>, Reinhard I. Boysen<sup>a</sup>, Maria T. Matyska<sup>c</sup>, Joseph J. Pesek<sup>c</sup> and Milton T.W. Hearn<sup>a\*</sup>]

<sup>a</sup> School of Chemistry, Monash University, Melbourne, VIC 3800, Australia

<sup>b</sup> Australian Centre for Research on Separation Science, School of Chemistry, Monash University, Melbourne, VIC 3800, Australia

<sup>c</sup> Department of Chemistry, San Jose State University, San Jose, CA 95192, USA

\*Corresponding author: Professor Milton T. W. Hearn

Phone: +61 3 9905 4547, Fax: +61 3 9905 8501,

E-mail address: milton.hearn@monash.edu

### SECTION S1. Potentiometric Titration Measurements.

The suspension was sonicated until homogeneous (>1 min) and stirred for 5 min followed by a potentiometric titration experiments. These experiments were performed with 50% (v/v) methanol/water solutions and involved the measurement of pH values of the solutions containing different silica/silica hydride particles at different mass concentrations being 0, 0.05, 0.1, 0.2, 0.5 and 1 mg/mL ( $n=3$ ). Other details are provided in the Experimental Methods section of the main manuscript.

**Table S1.** Potentiometric titration results summarizing the dependency of the pH values on particle concentration with a 50% (v/v) MeOH aqueous solution containing different concentration of the studied particles.

| Particle concentration<br>(mg/mL) | pH values    |           |           |             |           |
|-----------------------------------|--------------|-----------|-----------|-------------|-----------|
|                                   | Fused-silica | Hydride   | DH        | Cholesteryl | BDC18     |
| 0                                 | 6.74±0.04    | 6.74±0.04 | 6.74±0.04 | 6.74±0.04   | 6.74±0.04 |
| 0.05                              | 6.85±0.03    | 6.75±0.07 | 6.69±0.08 | 6.98±0.03   | 6.70±0.06 |
| 0.1                               | 7.09±0.05    | 7.06±0.03 | 6.95±0.01 | 7.05±0.09   | 6.68±0.01 |
| 0.2                               | 7.18±0.03    | 7.12±0.02 | 6.75±0.05 | 6.43±0.03   | 6.66±0.02 |
| 0.5                               | 6.81±0.05    | 6.73±0.05 | 6.44±0.02 | 6.16±0.03   | 5.97±0.02 |
| 1                                 | 6.66±0.09    | 6.58±0.10 | 6.24±0.01 | 5.93±0.02   | 5.50±0.07 |
